# Supplementary material for: Imbalance of flight–freeze responses and their cellular correlates in the Nlgn3−/y rat model of autism
Source: Springer Nature journal article supplement (doi:10.1186/s13229-022-00511-8), 2022-07-18
Supplement: MOESM1 [file 23278574]

**Additional file 1. Supplemental figures S1-S9.** Figure S1. *Nlgn3*<sup>-/-</sup> rats display reduced classic freezing behaviour in a contextual fear conditioning paradigm. Figure S2. Freezing when analysed as “paw immobility response” (all four paws unmoving but allowing for movement of head and neck). Figure S3. WT and *Nlgn3*<sup>-/-</sup> rats show similar activity in an open field, rotational platform & show no repetitive interaction with marbles in marble burying task. Figure S4. Effect of repeated footshocks & thermal stimulus on WT and *Nlgn3*<sup>-/-</sup> rats. Figure S5. Intrinsic properties of PAG cells recorded from WT and *Nlgn3*<sup>-/-</sup> rats. Figure S6. Hyperexcitability of dorsal, but not ventral PAG neurons in 8-10 week old *Nlgn3*<sup>-/-</sup> rats. Figure S7. PAG LFPs during fear recall are significantly shorter duration in *Nlgn3*<sup>-/-</sup> rats. Figure S8. Defensive reactions were not elicited by electrical stimulation of primary somatosensory cortex in WT or *Nlgn3*<sup>-/-</sup> rats. Figure S9. Western blots showing lack expression of NLGN3 in *Nlgn3*<sup>-/-</sup> rats both in sensory cortex and periaqueductal grey.

Figure S1

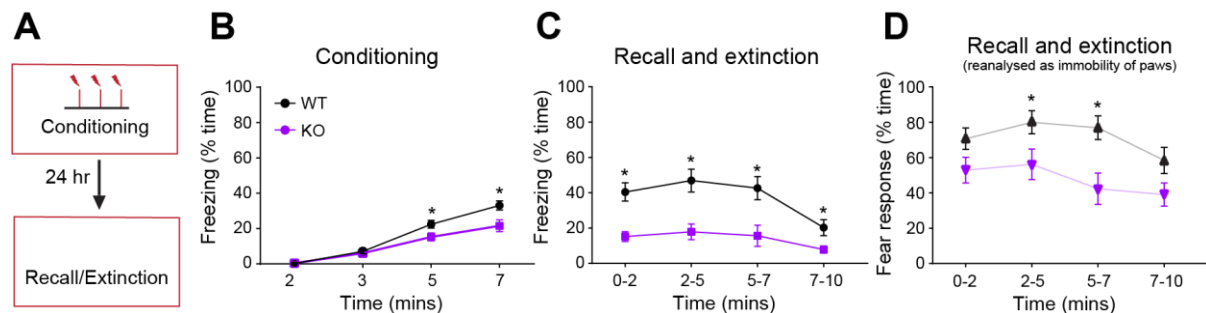

**Supplemental Figure 1. *Nlgn3*<sup>-/-</sup> rats display reduced classic freezing behaviour in a contextual fear conditioning paradigm.** (A) Schematic of contextual fear conditioning paradigm. (B) Classic freezing behaviour is reduced in *Nlgn3*<sup>-/-</sup> rats in comparison to WT during the conditioning phase of contextual fear conditioning ( $p = 0.025$ ,  $F_{(1, 25)} = 5.67$ , repeated measures two-way ANOVA, WT  $n = 13$ , KO  $n = 14$ ). (C) Classic freezing behaviour is reduced in *Nlgn3*<sup>-/-</sup> rats in comparison to WT during the recall phase of contextual fear conditioning ( $p < 0.0001$ ,  $F_{(1, 25)} = 26.61$ , repeated measures two-way ANOVA, WT  $n = 13$ , KO  $n = 14$ ). (D) When analysed as “immobility response” (i.e. all four paws unmoving but allowing for movement of head and neck, shown in light purple/grey) *Nlgn3*<sup>-/-</sup> rats show a response to the CS significantly different to classic freezing (main effects of scoring method:  $p < 0.0001$ ,  $F_{(1, 25)} = 200.82$ , and genotype:  $p < 0.0001$ ,  $F_{(1, 25)} = 20.65$ , three-way ANOVA, WT  $n = 13$ , KO  $n = 14$ ).

Data represented as mean  $\pm$  SEM.

Figure S2

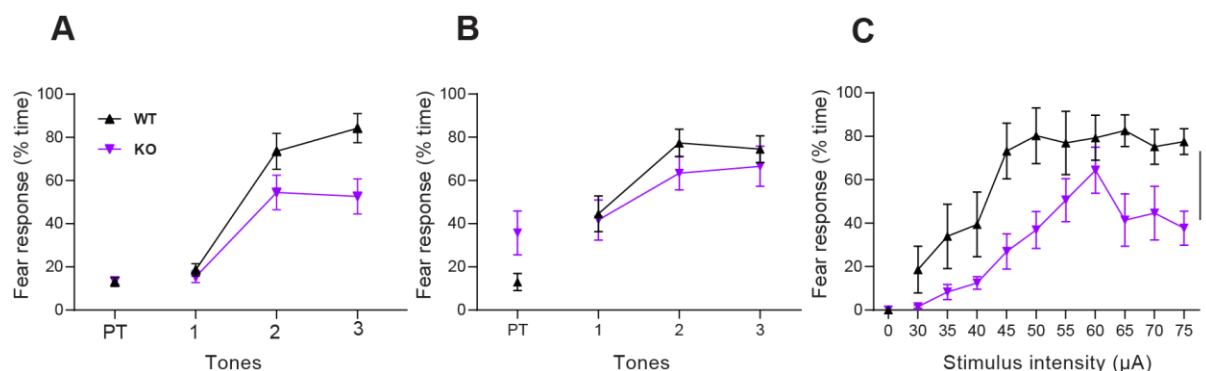

**Supplementary Figure 2:** Freezing when analysed as “paw immobility response” (all four paws unmoving but allowing for movement of head and neck). (A) *Nlgn3*<sup>-/-</sup> rats display less paw immobility response compared to WT rats during conditioning phase of auditory fear conditioning task ( $p = 0.008$ ,  $F_{(1,22)} = 8.333$ , repeated measures two-way ANOVA, WT  $n = 12$ , KO  $n = 12$ ). (B) *Nlgn3*<sup>-/-</sup> rats show similar paw immobility levels compared to WT rats during conditioning phase of auditory conditioning task in field recording electrode implanted rats ( $p = 0.95$ ,  $F_{(1,11)} = 0.004$ , repeated measures two-way ANOVA, WT  $n = 5$ , KO  $n = 8$ ). (C) Percentage time exhibiting paw immobility response is reduced in *Nlgn3*<sup>-/-</sup> rats during dPAG stimulation ( $p = 0.008$ ,  $F_{(1,12)} = 9.86$ , repeated measures two-way ANOVA, WT  $n = 5$ , KO  $n = 9$ ). Data represented as mean  $\pm$  SEM.

**Figure S3**

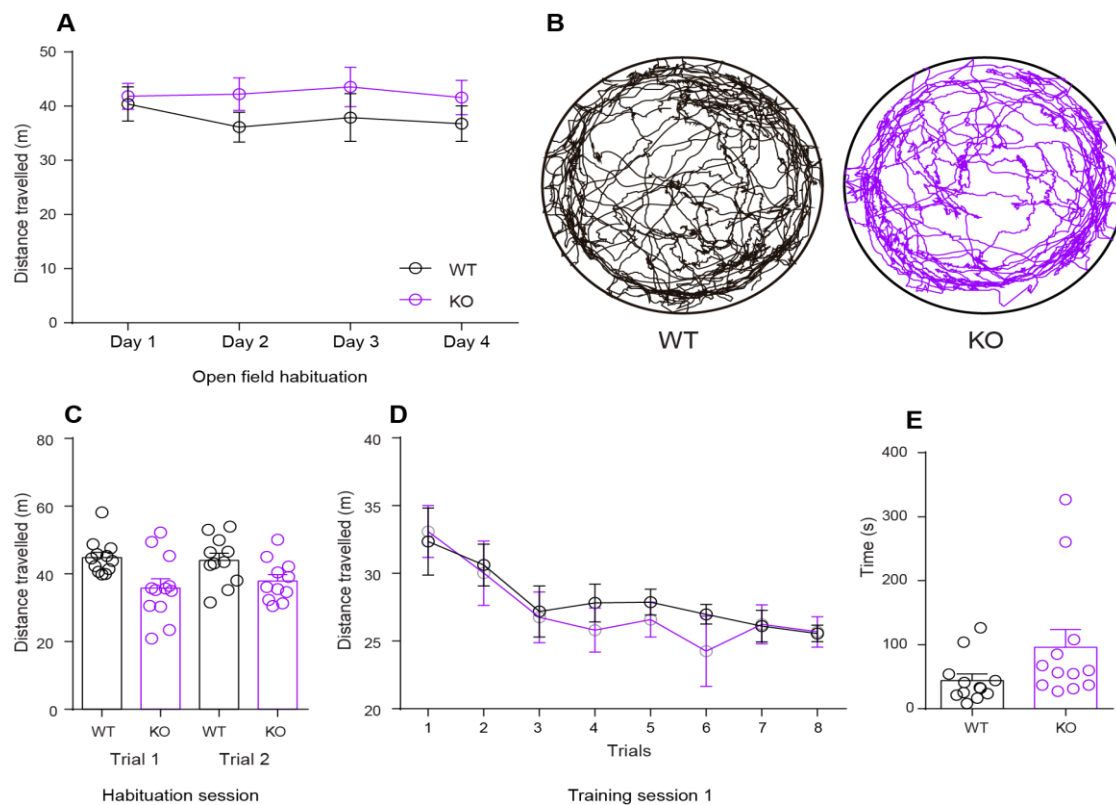

**Supplemental Figure 3. WT and *Nlgn3*<sup>-/-</sup> rats show similar activity in an open field, rotational platform & show no repetitive interaction with marbles in marble burying task.** (A) Distance travelled of WT and *Nlgn3*<sup>-/-</sup> rats during 4 days of open field testing ( $p = 0.29$ ,  $F_{(1,22)} = 1.19$ , repeated measures two-way ANOVA, WT  $n = 12$ , KO  $n = 12$ ). (B) Representative track plots from WT and *Nlgn3*<sup>-/-</sup> rats during habituation to the rotational platform. (C) Distance travelled is not different between WT and *Nlgn3*<sup>-/-</sup> rats during habituation to the rotational platform (Trial 1 WT vs *Nlgn3*<sup>-/-</sup>,  $p = 0.99$  & Trial 2 WT vs *Nlgn3*<sup>-/-</sup>,  $p = 0.89$ , one way ANOVA, WT  $n = 12$ , KO  $n = 11$ ). (D) Distance travelled is not different between WT and *Nlgn3*<sup>-/-</sup> rats during training session 1 of APA task ( $p = 0.59$ ,  $F_{(1,21)} = 0.29$ , repeated measures two-way

ANOVA, WT n = 12, KO n = 11). (E) Time spent in interaction with marbles is not different between WT and *Nlgn3*<sup>-/-</sup> in marble burying task (p = 0.09, unpaired t-test, WT n = 12, KO n = 12).

Data represented as mean ± SEM.

**Figure S4**

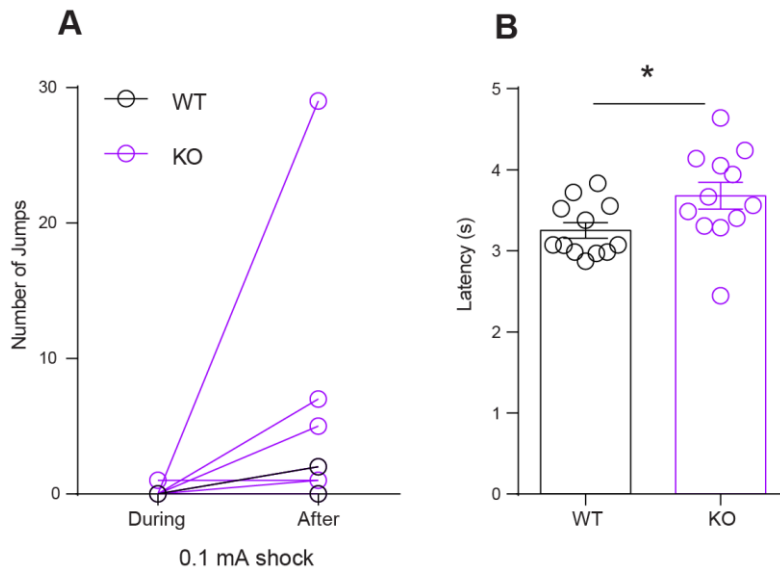

**Supplemental Figure 4. Effect of repeated footshocks & thermal stimulus on WT and *Nlgn3*<sup>-/-</sup> rats.** (A) Number of jumps exhibited in response to 0.1 mA foot-shocks during (following 0.06 mA) and after (following 1 mA) shock ramp testing. Number of jumps are not significantly different for WT (p = 0.35, paired t-test, n = 11) or KO (p = 0.10, paired t-test, n = 14) animals. (B) Tail-flick latency is significantly not different between WT and *Nlgn3*<sup>-/-</sup> rats during thermal tail flick test (p = 0.036, unpaired t-test, WT n = 12, KO n = 12).

Dots represent individual animals.

**Figure S5**

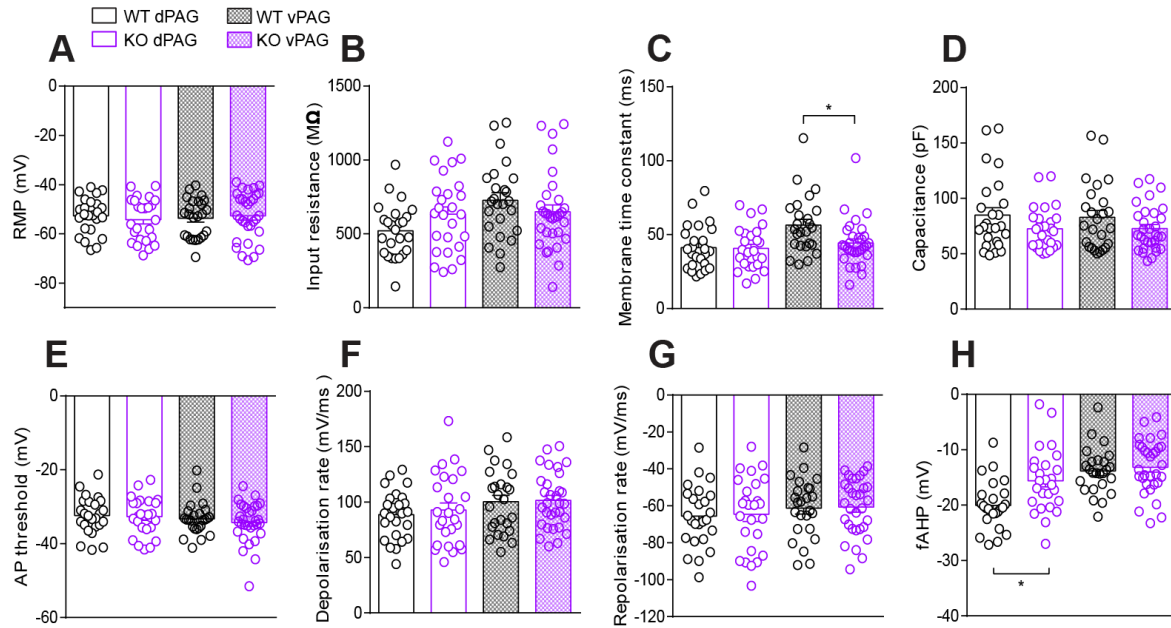

**Supplemental Figure 5. Intrinsic properties of PAG cells recorded from WT and *Nlgn3*<sup>-/-</sup> rats.**

(A) Resting membrane potential is comparable between *Nlgn3*<sup>-/-</sup> and WT rats in both dPAG ( $p = 0.61$ , GLMM, dPAG WT, 25 cells/ 10 rats, dPAG KO 26 cells/ 9 rats) and vPAG cells ( $p = 0.75$ , GLMM, WT 24 cells/10 rats, vPAG KO 28 cells/ 9 rats). (B) Input resistance is comparable between *Nlgn3*<sup>-/-</sup> and WT rats in both dPAG ( $p = 0.090$ , GLMM, dPAG WT, 25 cells/ 10 rats, dPAG KO 26 cells/ 9 rats) and vPAG cells ( $p = 0.26$ , GLMM, vPAG WT 24 cells/ 9 rats, vPAG KO 28 cells/ 10 rats). (C) Membrane time constant is comparable between *Nlgn3*<sup>-/-</sup> and WT rats in cells recorded from dPAG ( $p = 0.78$ , GLMM, dPAG WT, 25 cells/ 10 rats, dPAG KO 26 cells/ 9 rats), however is reduced in vPAG cells of *Nlgn3*<sup>-/-</sup> compared to WT ( $p = 0.0095$ , GLMM, vPAG WT 24 cells/ 9 rats, vPAG KO 28 cells/ 10 rats). (D) Capacitance is comparable between *Nlgn3*<sup>-/-</sup> and WT rats in both dPAG ( $p = 0.11$ , GLMM, dPAG WT, 25 cells/ 10 rats, dPAG KO 26 cells/ 9 rats) and vPAG cells ( $p = 0.19$ , GLMM, vPAG WT 24 cells/ 9 rats, vPAG KO 28 cells/ 10 rats). (E) Action potential (AP) threshold is comparable between *Nlgn3*<sup>-/-</sup> and WT rats in both dPAG ( $p = 0.86$ , GLMM, dPAG WT, 25 cells/ 10 rats, dPAG KO 26 cells/ 9 rats) and vPAG cells ( $p = 0.47$ , GLMM, vPAG WT 24 cells/ 9 rats, vPAG KO 28 cells/ 10 rats). (F) No difference in AP depolarisation rate between WT and *Nlgn3*<sup>-/-</sup> rats in either dPAG ( $p = 0.71$ , GLMM, dPAG WT, 25 cells/ 10 rats, dPAG KO 26 cells/ 9 rats) or vPAG cells ( $p = 0.90$ , GLMM, vPAG WT 24 cells/ 9 rats, vPAG KO 28 cells/ 10 rats). (G) No difference in AP repolarisation rate between WT and *Nlgn3*<sup>-/-</sup> rats in either dPAG ( $p = 0.76$ , GLMM, dPAG WT, 25 cells/ 10 rats, dPAG KO 26 cells/ 9 rats) or vPAG cells ( $p = 0.90$ , GLMM, vPAG WT 24 cells/ 9 rats, vPAG KO 28 cells/ 10 rats). (H) Fast afterhyperpolarisation potential (fAHP) is significantly reduced in *Nlgn3*<sup>-/-</sup> rat dPAG neurons in comparison to WT ( $p = 0.0047$ , GLMM, dPAG WT, 25 cells/ 10 rats, dPAG KO 26 cells/ 9 rats) but unchanged in vPAG neurons ( $p = 0.58$ , GLMM, vPAG WT 24 cells/ 9 rats, vPAG KO 28 cells/ 10 rats).

Data represented as mean  $\pm$  SEM, dots represent individual cells.

Figure S6

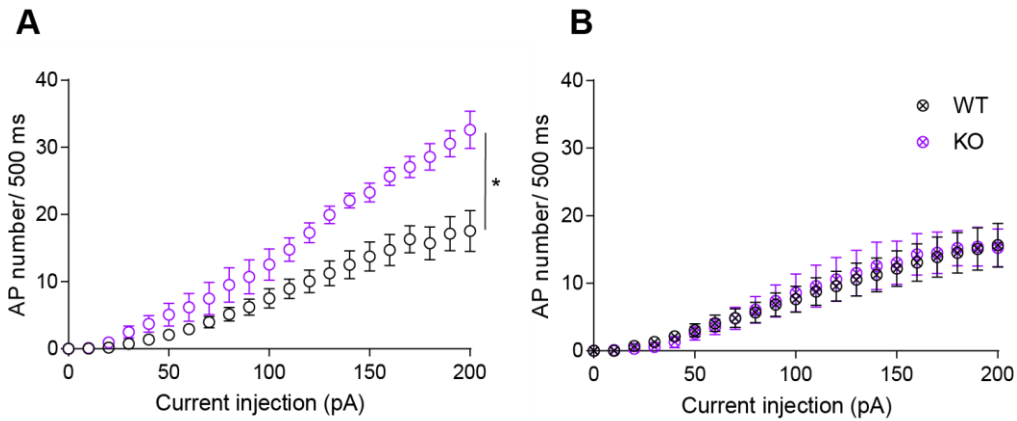

**Supplemental Figure 6. Hyperexcitability of dorsal, but not ventral PAG neurons in 8-10 week old *Nlgn3*<sup>-/-</sup> rats.** (A) dPAG cells from 8-10 week old *Nlgn3*<sup>-/-</sup> rats fire an increase number of action potentials in response to increasing current injections in comparison to WT ( $p = 0.0094$ ,  $F_{(1, 9)} = 10.82$ , WT  $n = 15$  cells/ 7 rats, KO  $n = 6$  cells/ 4 rats). (B) dPAG cells from 8-10 week old WT and *Nlgn3*<sup>-/-</sup> rats fire an equivalent number of action potentials in response to increasing current injections ( $p = 0.92$ ,  $F_{(1, 13)} = 0.0097$ , WT  $n = 14$  cells/ 7 rats, KO  $n = 6$  cells/ 4 rats).

Data represented as animal mean  $\pm$  SEM.

Figure S7

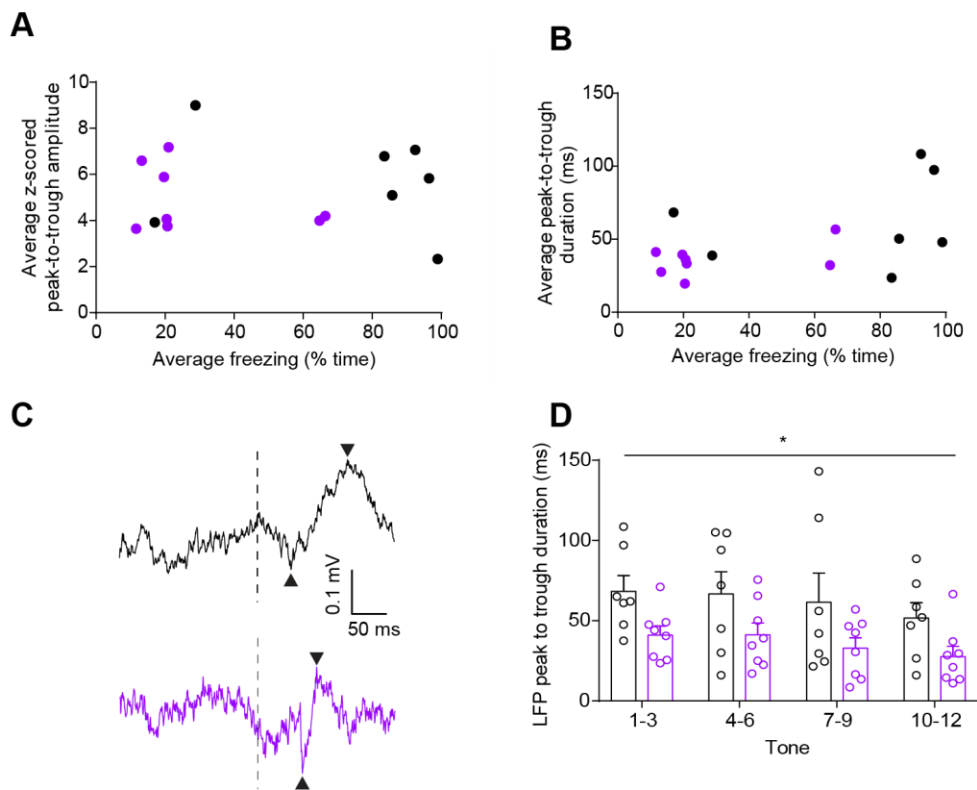

**Supplemental Figure 7. PAG LFPs during fear recall are significantly shorter duration in *Nlgn3*<sup>-/-</sup> rats.** (A) Average freezing behaviour and ERP amplitude do not correlate (WT:  $p = 0.63$ ,  $r = -$

0.22 n = 7, Pearson's R, KO: p = 0.41, r = -0.34, n = 8). (B) Average freezing behaviour and ERP duration do not correlate correlation (WT: p = 0.61, r = 0.23, Pearson's R, n = 7, KO: p = 0.23, r = 0.47, Pearson's R, n = 8). (C) Example LFP traces from WT (black) and *Nlgn3*<sup>-/-</sup> (purple) rats. Black arrows denote trough and peak. (D) *Nlgn3*<sup>-/-</sup> rats display significantly faster tone-evoked LFPs in the PAG during fear recall in comparison to WT rats (p = 0.042, F<sub>(1, 13)</sub> = 5.09, two-way ANOVA, WT n = 7, KO n = 8).

Data represented as mean ± SEM, dots represent individual animals.

Figure S8

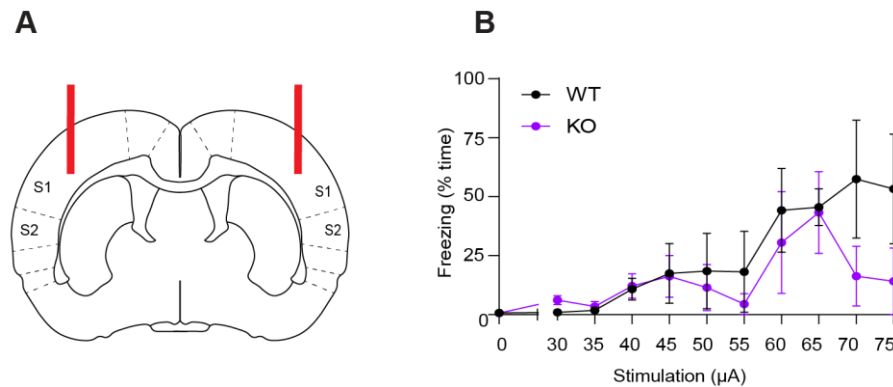

**Supplemental figure 8. Defensive reactions were not elicited by electrical stimulation of primary somatosensory cortex in WT or *Nlgn3*<sup>-/-</sup> rats.** (A) Schematic depicting stimulating electrode (red lines) implant site. (B) Freezing behaviour, defined as no movement except for respiration, for 3 WT and 3 *Nlgn3*<sup>-/-</sup> rats receiving cortical stimulation. Resting or sleeping was indistinguishable from freezing given this definition.

Data represented as mean ± SEM, points represent average freezing time for 3 minutes post-stimulation.

Figure S9

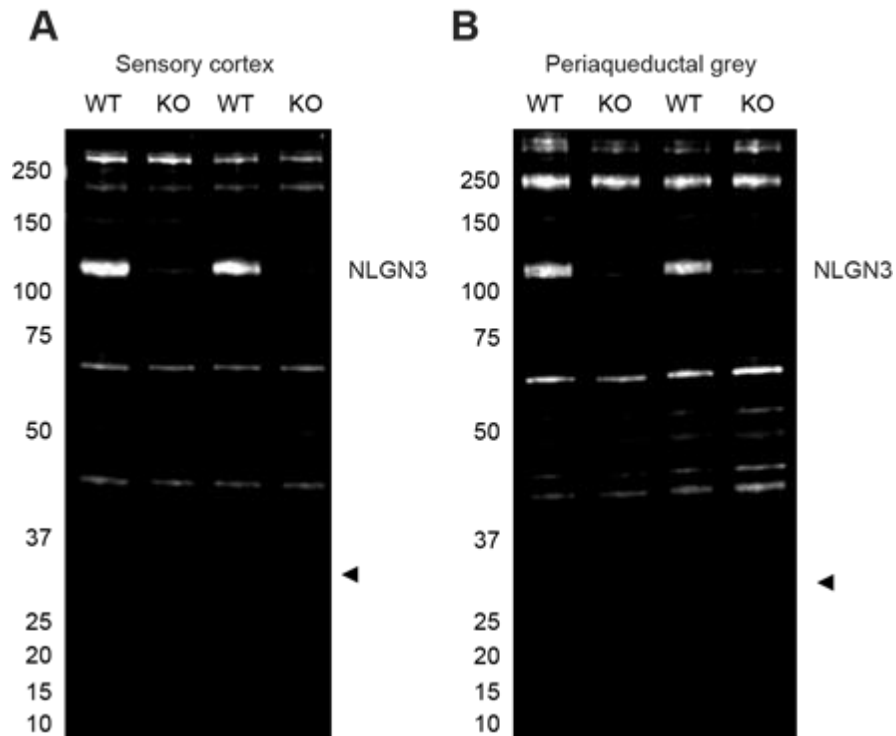

**Supplemental figure 9. Western blots showing lack expression of NLGN3 in *Nlgn3*<sup>-/-</sup> rats both in sensory cortex and periaqueductal grey.** Representative western blot of cortical (A) and periaqueductal grey (B) of WT and *Nlgn3*<sup>-/-</sup> tissue using anti-NLGN3 antibody. No NLGN3 protein was found in *Nlgn3*<sup>-/-</sup> rats (WT n = 4, KO n = 4).
